# Supplementary material
Source: PubMed Central journal article supplement (PMC5319721)
Supplement: DB160663SupplementaryData.pdf [file DB160663SupplementaryData.pdf]

SUPPLEMENTARY DATA

**Supplementary Figure 1. Metabolomics analysis identifies an alteration of bile-acid composition by CAPE.** Mice on a HFD were orally treated with or without CAPE for 4 weeks ( $n = 5$ ). (A) Bile salt hydrolase (BSH) enzyme activity was determined from the cecal contents. (B,D) Total levels of bile acids in the feces (B) and the ileums (D). (C) Individual bile acid levels in the feces. (E) Individual bile acid levels in the ileum. (F) The percentage of the individual taurine-conjugated bile acids in the ileum. (G) Individual bile acid levels in the liver. (H) Individual bile acid levels in serum. Data are presented as the means  $\pm$  sd. Two-tailed Student's t-test: \*\* $P < 0.01$  compared to the vehicle.

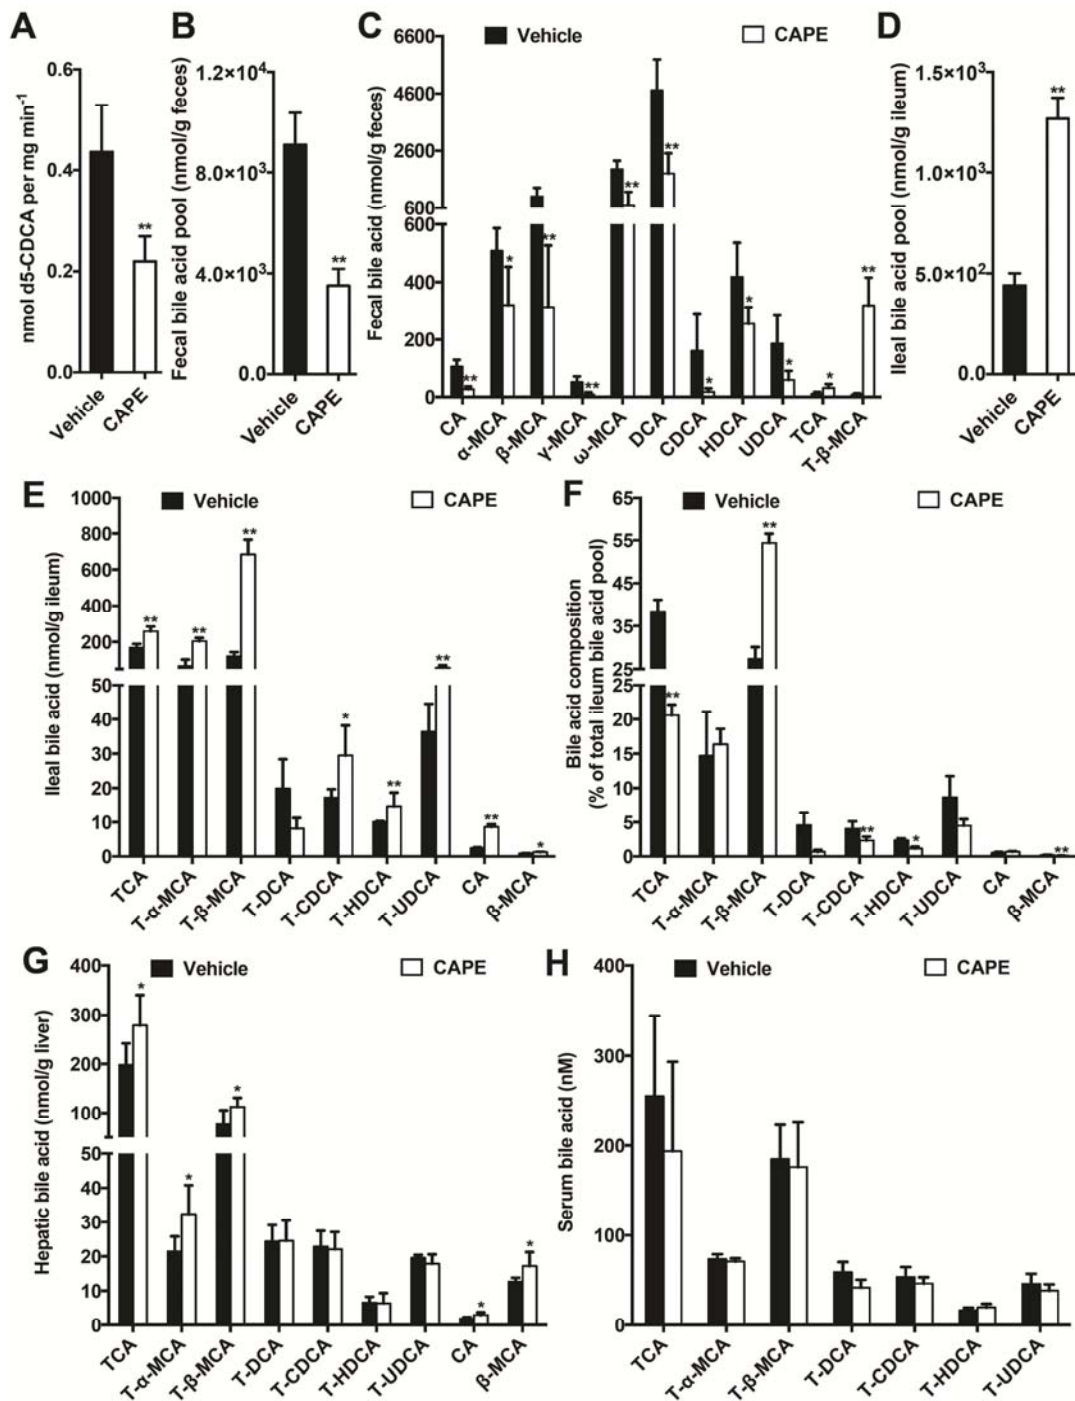

SUPPLEMENTARY DATA

**Supplementary Figure 2. CAPE inhibits intestinal FXR signaling.** Mice were orally treated with or without CAPE o.p.d. for 4 weeks on a HFD ( $n = 5$ ). qPCR analysis of the mRNA levels of FXR target genes in the ileum (A) and the liver (B). Data are presented as the means  $\pm$  sd. Two-tailed Student's t-test:  $*P < 0.05$  compared to the vehicle.

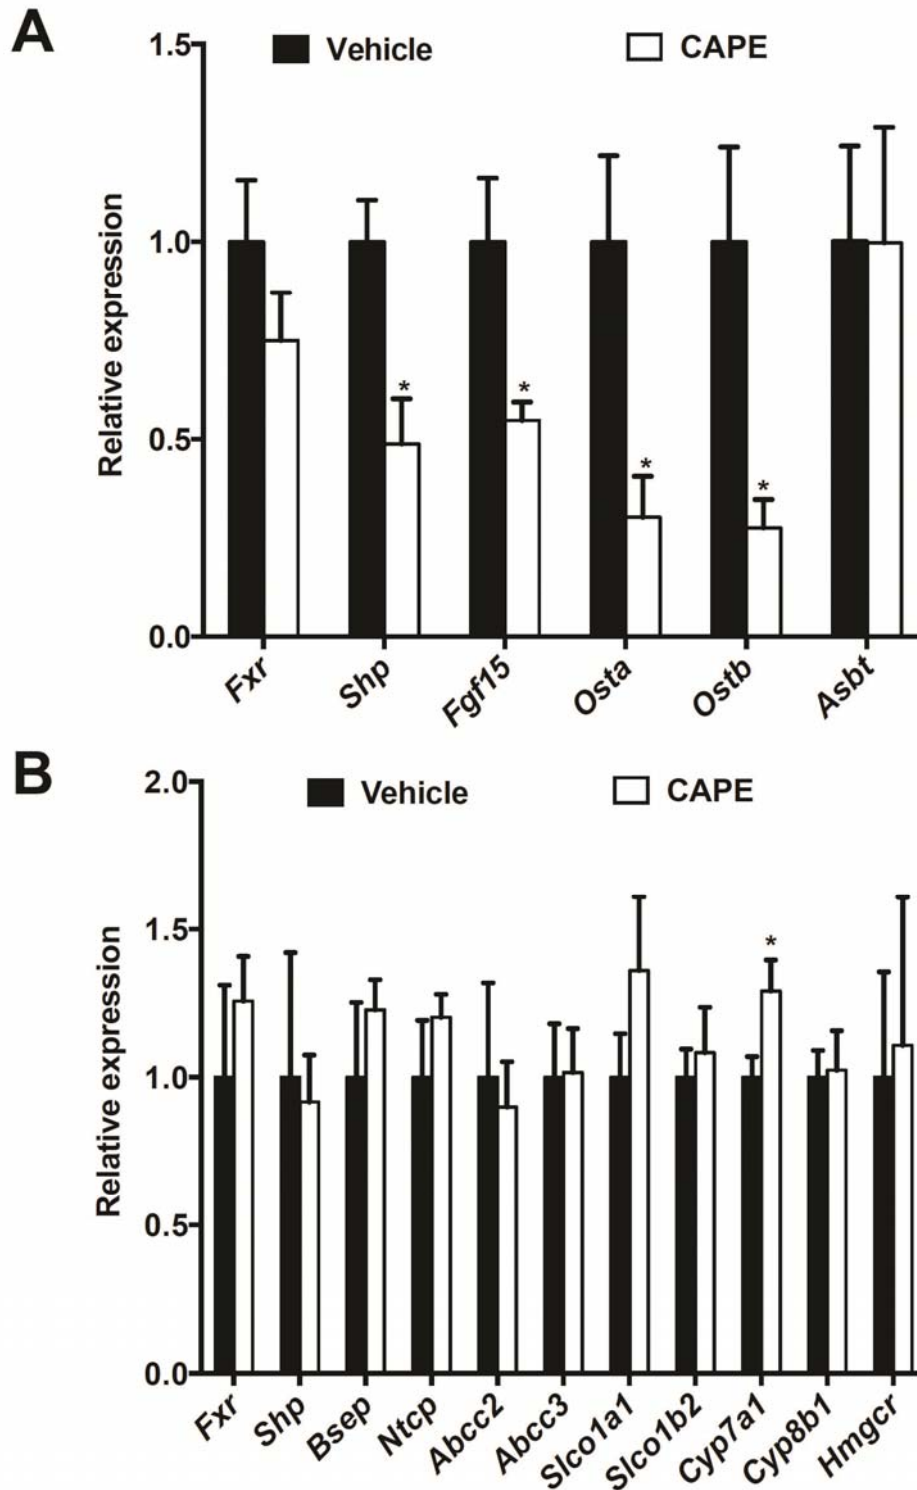

SUPPLEMENTARY DATA

**Supplementary Figure 3. CAPE suppresses the HFD-induced increases in hepatic gluconeogenesis through inhibition of the intestinal FXR.** Vehicle-, CAPE-, GW4064-, and CAPE+GW4064-treated mice fed a HFD for 4 weeks ( $n = 5$ ). (A) qPCR analysis of the mRNA levels of FXR target genes in the ileum. (B,C) GTT (B) and AUC (C). (D,E) PTT (D) and AUC (E). Data are presented as the means  $\pm$  sd. One-way ANOVA with Tukey's correction: \* $P < 0.05$ , \*\* $P < 0.01$  compared to the vehicle. # $P < 0.05$ , ##  $P < 0.01$  compared to the CAPE treatment.

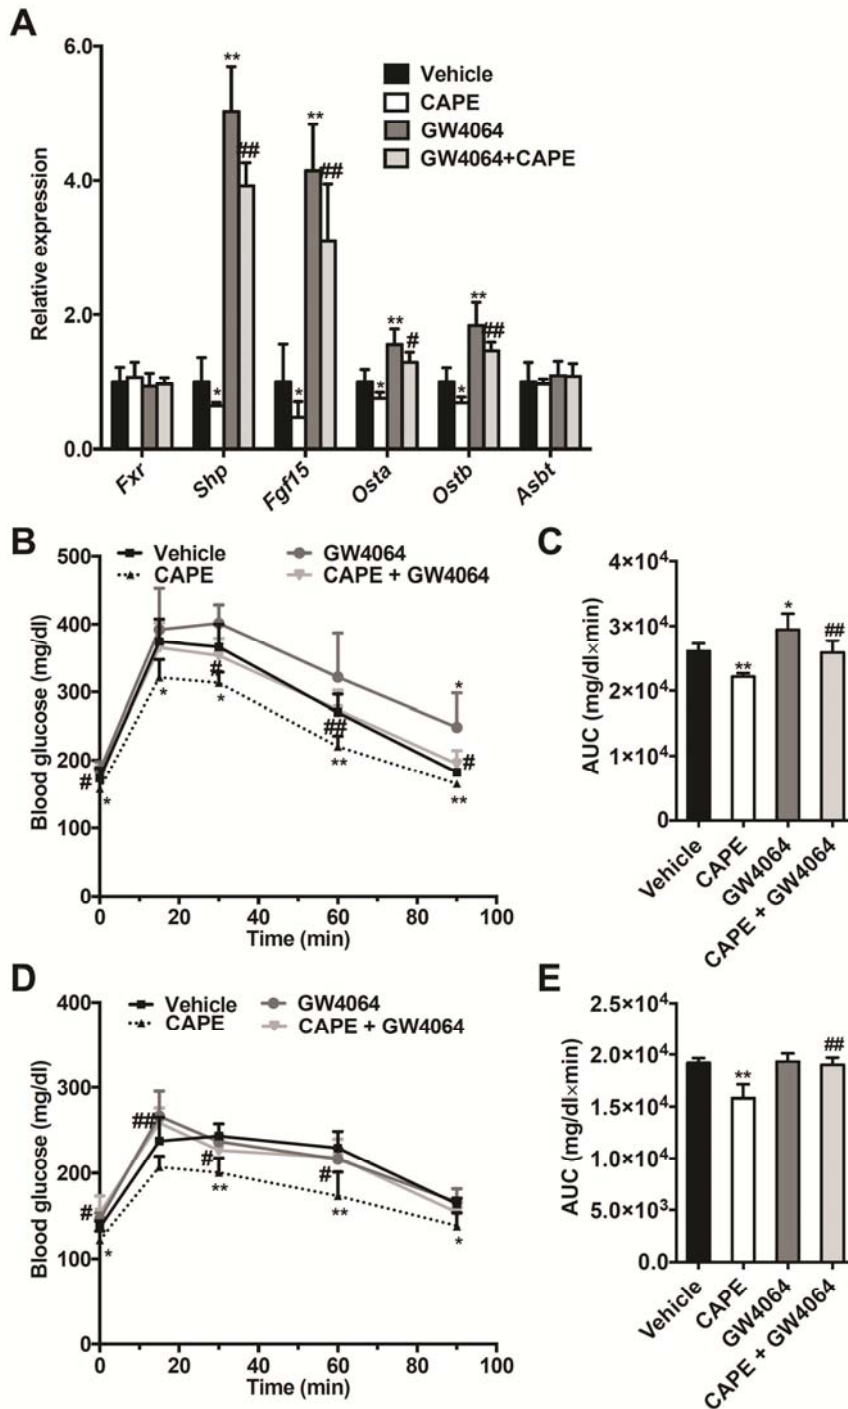

SUPPLEMENTARY DATA

**Supplementary Figure 4. Comparison of the ions identified in the PLS-DA model with authentic standards.**

The fragmentation patterns of authentic standards for (A) citrate, (B)  $\alpha$ -ketoglutarate, (C) fumarate, and (D) malate are compared to the fragmentation patterns of molecules in the liver extracts.

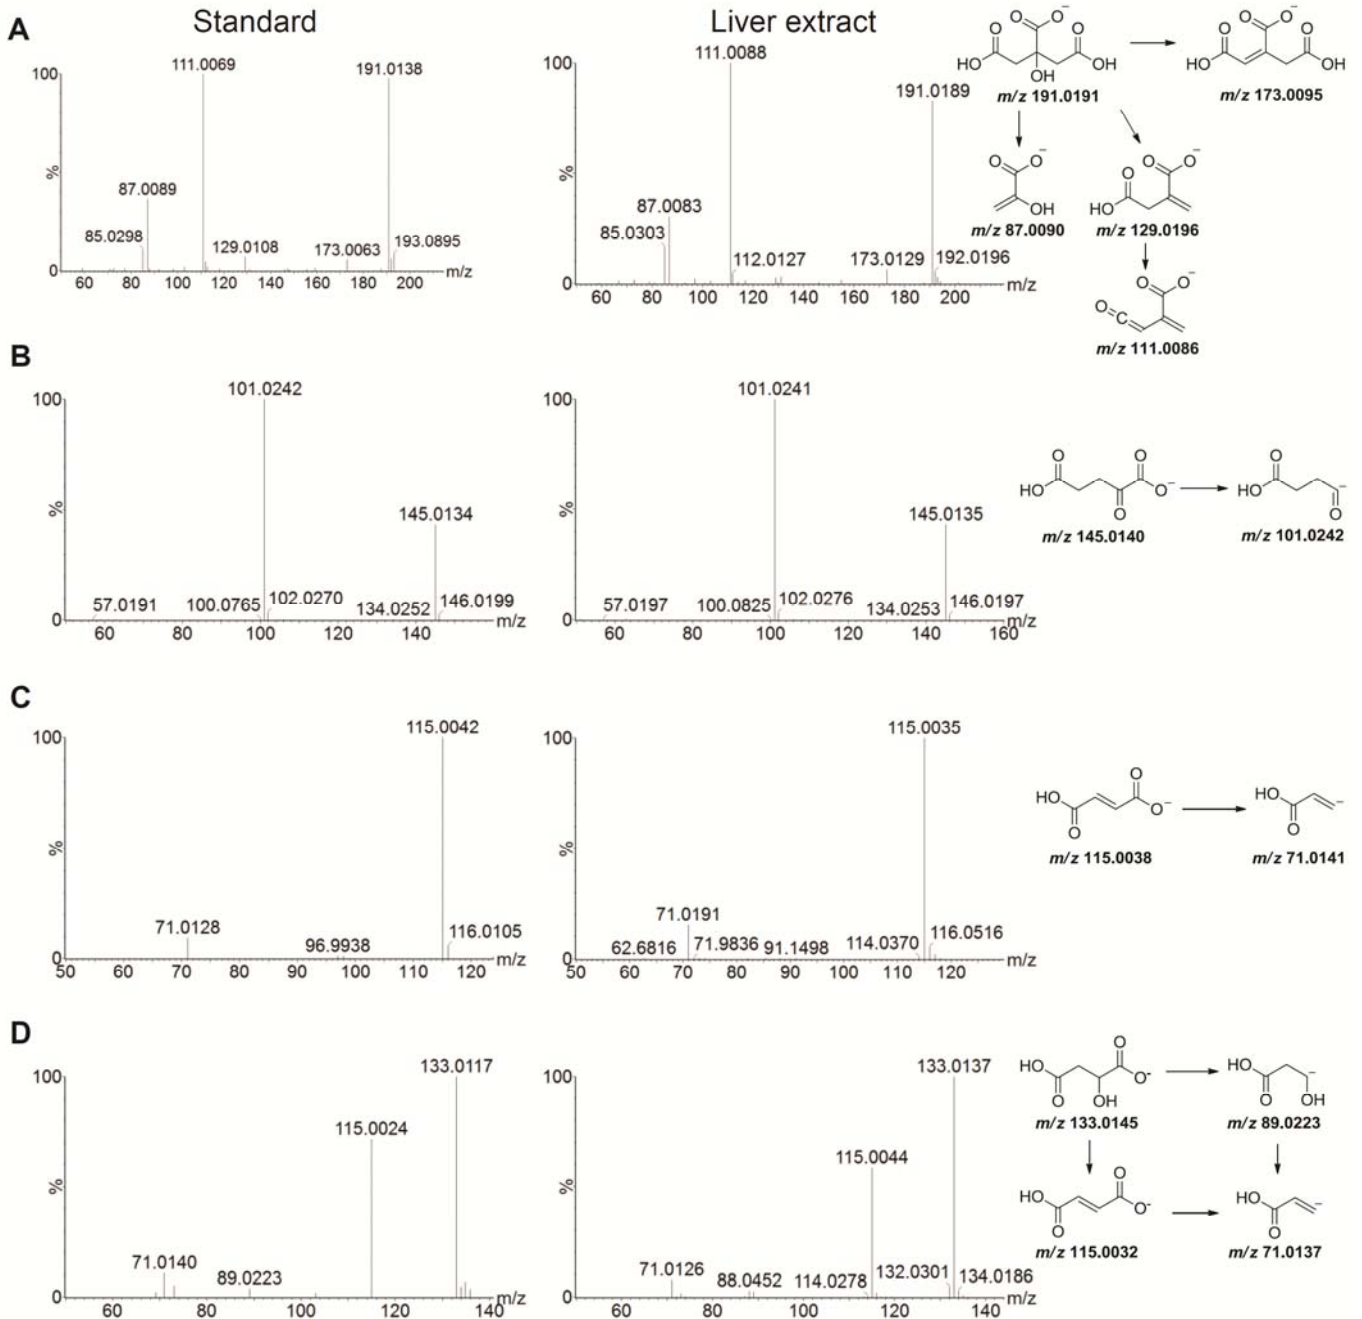

## SUPPLEMENTARY DATA

**Supplementary Figure 5. CAPE treatment decreases ileum and serum ceramide levels through inhibition of intestinal FXR.** (A, B) The total and individual ceramide levels in the ileum (A) and serum (B) from  $Fxr^{fl/fl}$  mice and  $Fxr^{\Delta IE}$  mice on a HFD and treated with or without CAPE for 4 weeks ( $n = 5$ ). (C) The mRNA levels of FXR target genes in the ileum from  $Fxr^{fl/fl}$  mice and  $Fxr^{\Delta IE}$  mice on a HFD and treated with or without CAPE for 4 weeks ( $n = 5$ ). (D) The expression of mRNAs encoding ceramide synthesis-related genes in the ileum from  $Fxr^{fl/fl}$  mice and  $Fxr^{\Delta IE}$  mice on a HFD and treated with or without CAPE for 4 weeks ( $n = 5$ ). (A-D) Data are presented as the means  $\pm$  sd. One-way ANOVA with Tukey's correction:  $*P < 0.05$ ,  $**P < 0.01$  compared to the vehicle-treated  $Fxr^{fl/fl}$  mice. (E) The total and individual ceramide levels in the serum from vehicle-, CAPE-, and CAPE+GW4064-treated mice on a HFD for 4 weeks ( $n = 5$ ). (F) The expression of mRNAs encoding ceramide synthesis-related genes in the ileum from vehicle-, CAPE-, and CAPE+GW4064-treated mice on a HFD for 4 weeks ( $n = 5$ ). Data are presented as the means  $\pm$  sd. One-way ANOVA with Tukey's correction:  $*P < 0.05$  compared to the vehicle.  $\#P < 0.05$ ,  $\#\# P < 0.01$  compared to the CAPE treatment.

SUPPLEMENTARY DATA

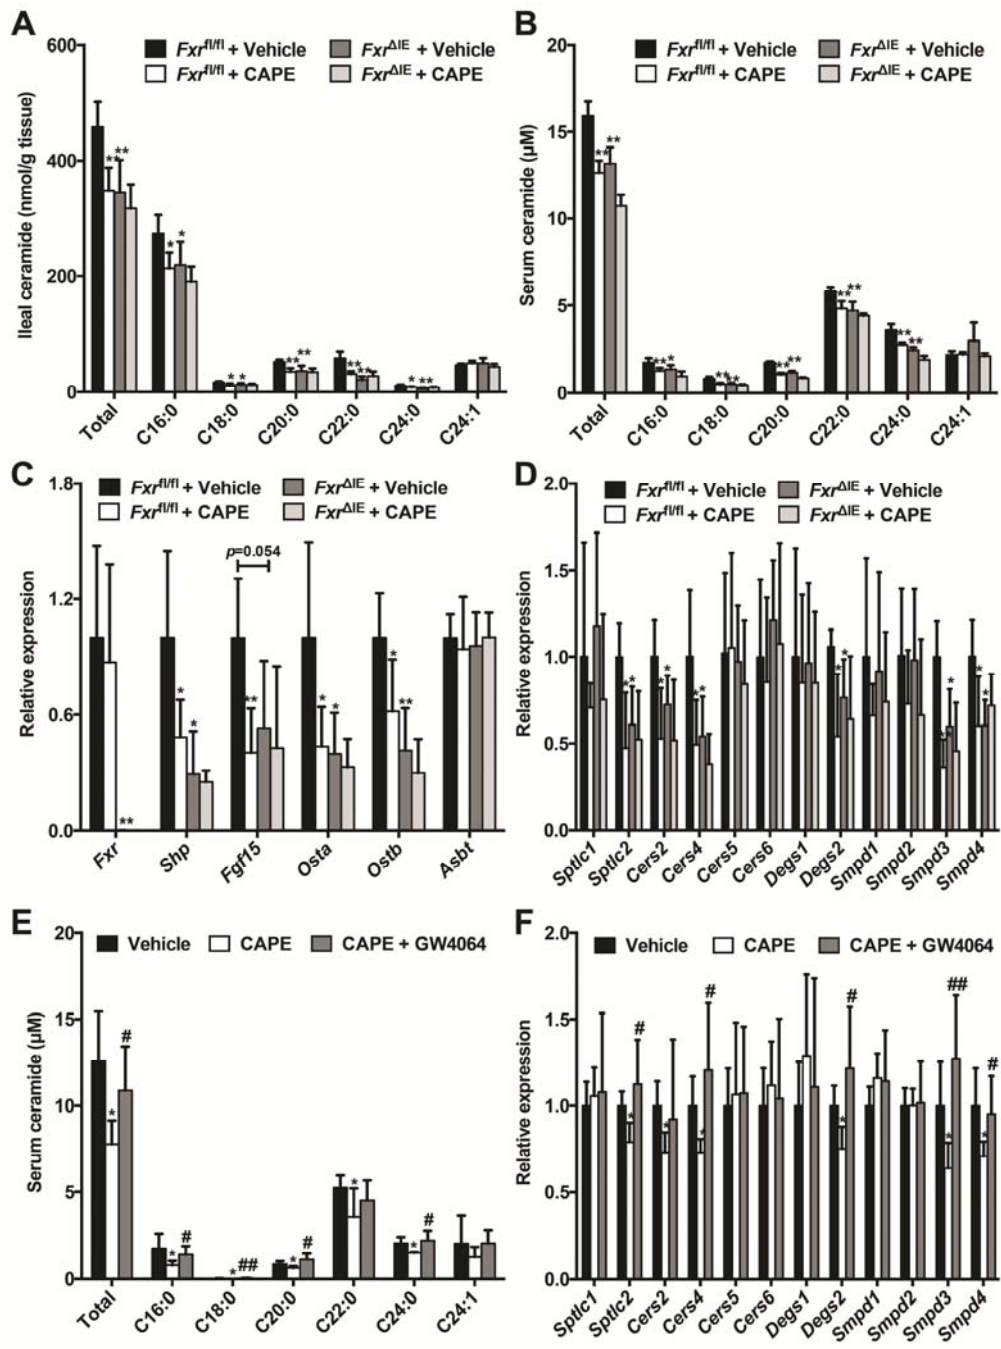

SUPPLEMENTARY DATA

**Supplementary Figure 6. Summary of CAPE-improved HFD-disrupted hepatic glucose homeostasis through BSH-T-β-MCA-intestinal FXR-ceramide pathway, leading to decreased hepatic mitochondrial acetyl-CoA levels and PC activities without affecting hepatic insulin signaling.** Ceramides substantially attenuate mitochondrial citrate synthase activity primarily through the induction of ER stress, excessive ER-mitochondria coupling, and calcium overload, primarily triggering increased hepatic mitochondrial acetyl-CoA levels and PC activities. Administration of CAPE, an inhibitor of BSH, increases intestinal T-β-MCA that selectively suppresses intestinal FXR signaling, thus repressing intestinal ceramide synthesis genes *Smpd3* and *Sptlc2*, which are novel intestinal FXR target genes. Decreased ceramides decrease hepatic mitochondrial acetyl-CoA levels and PC activities, and further attenuated hepatic gluconeogenesis, independent of body weight and hepatic insulin signaling changes.

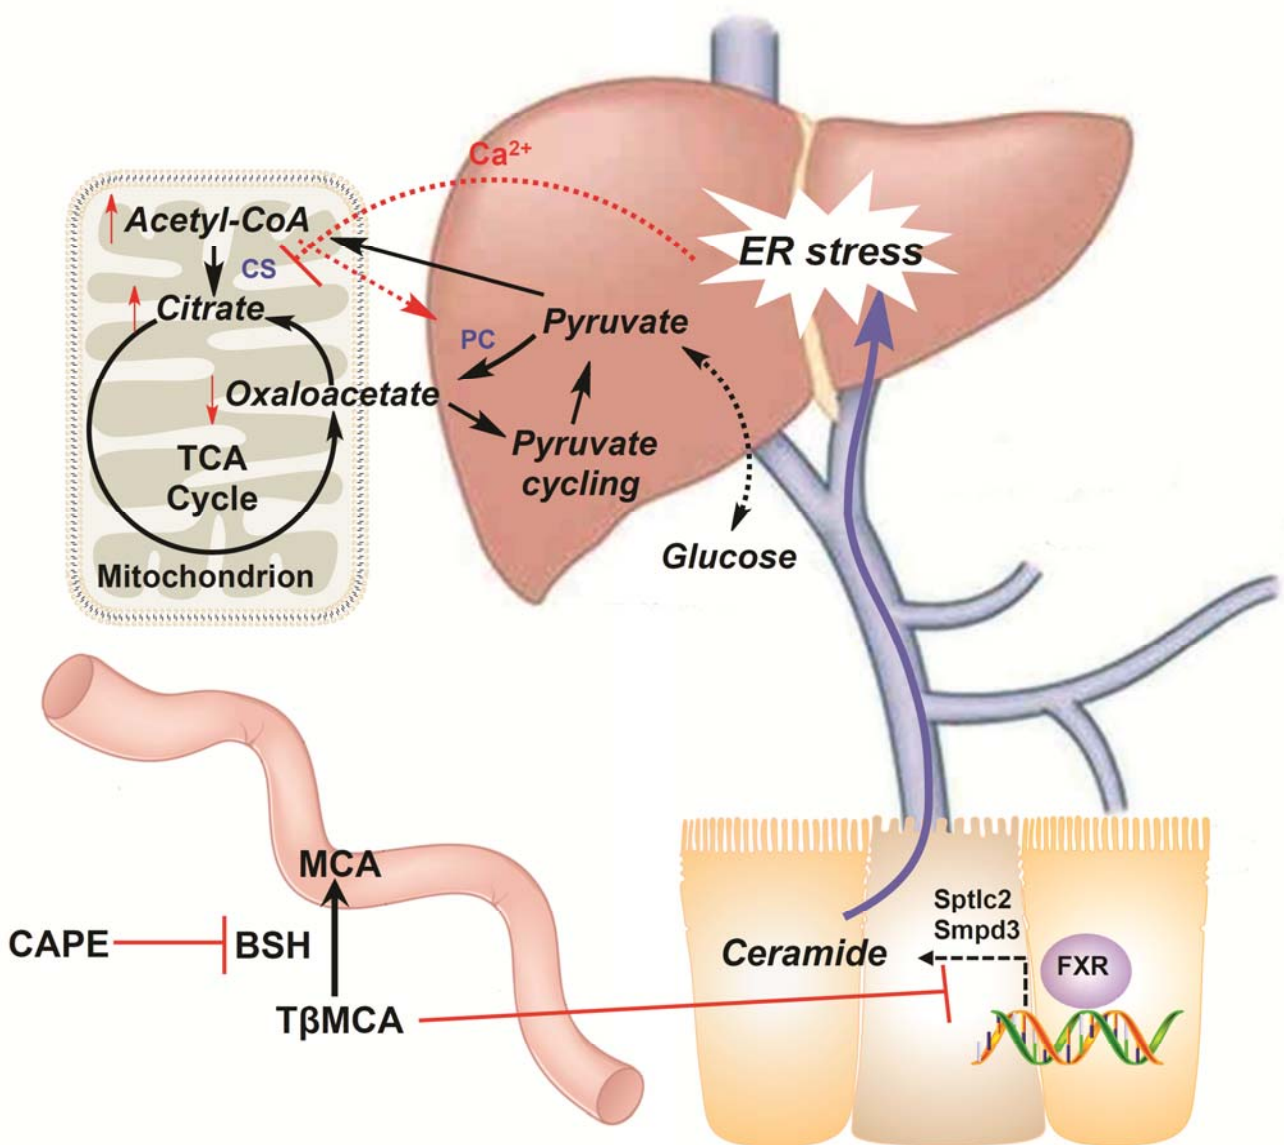

SUPPLEMENTARY DATA

Supplementary Table 1. Primers used for qPCR

| Mouse primers      | Sequence                         |
|--------------------|----------------------------------|
| <i>β-Actin</i> FWD | 5'- TTCTTTGCAGCTCCTTCGTT -3'     |
| <i>β-Actin</i> REV | 5'- ATGGAGGGGAATACAGCCC -3'      |
| <i>Fxr</i> FWD     | 5'- TGGGCTCCGAATCCTCTTAGA -3'    |
| <i>Fxr</i> REV     | 5'- TGGTCCTCAAATAAGATCCTTGG -3'  |
| <i>Shp</i> FWD     | 5'- TCTGCAGGTCGTCGACTATTC -3'    |
| <i>Shp</i> REV     | 5'- AGGCAGTGGCTGTGAGATGC -3'     |
| <i>Fgf15</i> FWD   | 5'- GCCATCAAGGACGTCAGCA -3'      |
| <i>Fgf15</i> REV   | 5'- CTTCTCCGAGTAGCGAATCAG -3'    |
| <i>Osta</i> FWD    | 5'- AATTACAGCATCTCCCCTGC -3'     |
| <i>Osta</i> REV    | 5'- GGTCAAGATGATGGTGAGGG -3'     |
| <i>Ostb</i> FWD    | 5'- AGAGAAAGCTGCAGCCAATG -3'     |
| <i>Ostb</i> REV    | 5'- CCAGGACCAGGATGGAATAA -3'     |
| <i>Bsep</i> FWD    | 5'- TCTGACTCAGTGATTCTTCGCA -3'   |
| <i>Bsep</i> REV    | 5'- GTGTAGAGTGAAGTCCTCCTTAGC -3' |
| <i>Ntcp</i> FWD    | 5'- CAAACCTCAGAAGGACCAAACA -3'   |
| <i>Ntcp</i> REV    | 5'- GTAGGAGGATTATTCCTGTTGTG -3'  |
| <i>Abcc2</i> FWD   | 5'- GTGTGGATTCCCTTGGGCTTT -3'    |
| <i>Abcc2</i> REV   | 5'- CACAACGAACACCTGCTTGG -3'     |
| <i>Abcc3</i> FWD   | 5'- GGGCTCCAAGTTCTGGGAC -3'      |
| <i>Abcc3</i> REV   | 5'- CCGTCTTGAGCCTGGATAAC -3'     |
| <i>Slco1a1</i> FWD | 5'- ACTCCATAATGCCCTTGG -3'       |
| <i>Slco1a1</i> REV | 5'- TAATCGGGCCAACAATCTTC -3'     |
| <i>Slco1b2</i> FWD | 5'- ACCAAACTCAGCATCCAAGC -3'     |
| <i>Slco1b2</i> REV | 5'- TAGCTGAATGAGAGGGCTGC -3'     |
| <i>Spltc1</i> FWD  | 5'- CGAGGGTTCTATGGCACATT-3'      |
| <i>Spltc1</i> REV  | 5'- GGTGGAGAAGCCATACGAGT -3'     |
| <i>Spltc2</i> FWD  | 5'- TCACCTCCATGAAGTGCATC -3'     |
| <i>Spltc2</i> REV  | 5'- CAGGCGTCTCCTGAAATACC -3'     |
| <i>Degs1</i> FWD   | 5'- AATGGGTCTACACGGACCAG -3'     |
| <i>Degs1</i> REV   | 5'- TGGTCAGGTTTCATCAAGGAC -3'    |
| <i>Degs2</i> FWD   | 5'- AAGCCAATGGACCACAAACT -3'     |
| <i>Degs2</i> REV   | 5'- TGCTTGGAGAGCCCTTCTAAT -3'    |
| <i>Cers2</i> FWD   | 5'- AAGTGGGAAACGGAGTAGCG-3'      |
| <i>Cers2</i> REV   | 5'- ACAGGCAGCCATAGTCGTTT -3'     |
| <i>Cers4</i> FWD   | 5'- GGATTAGCTGATCTCCGCAC -3'     |
| <i>Cers4</i> REV   | 5'- CCAGTATGTCTCCTGCCACA -3'     |
| <i>Cers5</i> FWD   | 5'- CTTCTCCGTGAGGATGCTGT-3'      |
| <i>Cers5</i> REV   | 5'- GTGTCATTGGGTTCCACCTT -3'     |
| <i>Cers6</i> FWD   | 5'- AAGCCAATGGACCACAAACT -3'     |
| <i>Cers6</i> REV   | 5'- TGCTTGGAGAGCCCTTCTAAT -3'    |
| <i>Smpd1</i> FWD   | 5'- GTTACCAGCTGATGCCCTTC -3'     |
| <i>Smpd1</i> REV   | 5'- AGCAGGATCTGTGGAGTTG -3'      |
| <i>Smpd2</i> FWD   | 5'- AGCAGGATCTGTGGAGTTG -3'      |
| <i>Smpd2</i> REV   | 5'- CTCCAGCCATGAAGCTCAAC -3'     |
| <i>Smpd3</i> FWD   | 5'- CCTGACCAGTGCCATTCTTT -3'     |
| <i>Smpd3</i> REV   | 5'- AGAAACCCGGTCTCCTGACT -3'     |
| <i>Smpd4</i> FWD   | 5'- ACCTGGCCCTCAATCCATTG -3'     |
| <i>Smpd4</i> REV   | 5'- ATAGGCACAGTCCGAAGTACG -3'    |



SUPPLEMENTARY DATA

|                  |                                  |
|------------------|----------------------------------|
| <i>Cs</i> FWD    | 5'- GGACAATTTTCCAACCAATCTGC -3'  |
| <i>Cs</i> REV    | 5'- TCGGTTTCATTCCTCTGCATA -3'    |
| <i>Idh3a</i> FWD | 5'- TGGGTGTCCAAGGTCTCTC -3'      |
| <i>Idh3a</i> REV | 5'- TGGGTGTCCAAGGTCTCTC -3'      |
| <i>Idh3b</i> FWD | 5'- TGGAGAGGTCTCGGAACATCT -3'    |
| <i>Idh3b</i> REV | 5'- TGGAGAGGTCTCGGAACATCT -3'    |
| <i>Idh3g</i> FWD | 5'- GGTGCTGCAAAGGCAATGC -3'      |
| <i>Idh3g</i> REV | 5'- TATGCCGCCACCATACTTAG -3'     |
| <i>Pc</i> FWD    | 5'- CTGAAGTTCCAAACAGTTTCGAGG -3' |
| <i>Pc</i> REV    | 5'- CGCACGAAACACTCGGATG -3'      |
| <i>Pepck</i> FWD | 5'- CTGCATAACGGTCTGGACTTC -3'    |
| <i>Pepck</i> REV | 5'- CAGCAACTGCCCGTACTCC -3'      |
| <i>G6pc</i> FWD  | 5'- CGACTCGCTATCTCCAAGTGA -3'    |
| <i>G6pc</i> REV  | 5'- GTTGAACCAGTCTCCGACCA -3'     |
| <i>Pdh</i> FWD   | 5'- GAAATGTGACCTTCATCGGCT -3'    |
| <i>Pdh</i> REV   | 5'- TGATCCGCCTTTAGCTCCATC -3'    |
| <i>Atf4</i> FWD  | 5'- ATGGCGCTCTTCACGAAATC -3'     |
| <i>Atf4</i> REV  | 5'- ACTGGTCGAAGGGGTCATCAA -3'    |
| <i>Atf6</i> FWD  | 5'- TCGCCTTTTAGTCCGGTTCTT -3'    |
| <i>Atf6</i> REV  | 5'- GGCTCCATAGGTCTGACTCC -3'     |
| <i>Bip</i> FWD   | 5'- ACTTGGGGACCACCTATTCCT -3'    |
| <i>Bip</i> REV   | 5'- ATCGCCAATCAGACGCTCC -3'      |
| <i>Chop</i> FWD  | 5'- ACCTTCACTACTTTGACCCTG -3'    |
| <i>Chop</i> REV  | 5'- GATGTGCGTGTGACCTCTGT -3'     |
| <i>Vdac1</i> FWD | 5'- CCCACATACCCGATCTTGG -3'      |
| <i>Vdac1</i> REV | 5'- GTGGTTTCCGTGTTGGCAGA -3'     |
| <i>Pacs2</i> FWD | 5'- GCAGGAAGCGGTACAAGAACA -3'    |
| <i>Pacs2</i> REV | 5'- CTGGACAGGGAGACGATCC -3'      |
| <i>Mfn2</i> FWD  | 5'- CCAACTCCAAGTGTCCGCTC -3'     |
| <i>Mfn2</i> REV  | 5'- GTCCAGCTCCGTGGTAACATC -3'    |
| <i>Ip3r1</i> FWD | 5'- CGTTTTGAGTTTGAAGGCGTTT -3'   |
| <i>Ip3r1</i> REV | 5'- CATCTTGCGCCAATTCCCG -3'      |
| <i>Ip3r2</i> FWD | 5'- TTCAGTTCCTATCGAGAGGATGT -3'  |
| <i>Ip3r2</i> REV | 5'- GCTGATTGACGCAAGGTTCG -3'     |
